# Supplementary material
Source: MDPI journal article supplement (https://www.mdpi.com/1999-4907/12/5/539)
Supplement: s1 [file s1]

Supplementary material

# Vertical Distribution of Mercury in Forest Soils and Its Transfer to Edible Mushrooms in Relation to Tree Species

Václav Pecina <sup>1,2,\*</sup>, Martin Valtera <sup>3</sup>, Gabriela Trávníčková <sup>1</sup>, Renata Komendová <sup>1</sup>, Radek Novotný <sup>4</sup>, Martin Brtnický <sup>1,2</sup> and David Juříčka <sup>3,\*</sup>

<sup>1</sup> Institute of Chemistry and Technology of Environmental Protection, Faculty of Chemistry, Brno University of Technology, Purkyňova 118, 61200 Brno, Czech Republic; xcpecina@fch.vut.cz (V.P.); xctravnicko-vag@vutbr.cz (G.T.); komendova@fch.vut.cz (R.K.)

<sup>2</sup> Department of Agrochemistry, Soil Science, Microbiology and Plant Nutrition, Faculty of AgriSciences, Mendel University in Brno, Zemědělská 1, 613 00 Brno, Czech Republic; martin.brtnicky@mendelu.cz (M.B.)

<sup>3</sup> Department of Geology and Soil Science, Faculty of Forestry and Wood Technology, Mendel University in Brno, Zemědělská 3, 613 00 Brno, Czech Republic; martin.valtera@mendelu.cz (M.V.); david.juricka@mendelu.cz (D.J.)

<sup>4</sup> Forestry and Game Management Research Institute, Strnady 136, Jíloviště 252 02, Czech Republic; novotny@vulhm.cz (R.N.)

\* Correspondence: xcpecina@fch.vut.cz (V.P.); david.juricka@mendelu.cz (D.J.); Tel.: +420-545-134-309 (D.J.)

**Table S1.** Coefficients of the fixed effects in mixed effects models of Hg contents in different soil depths, calculated separately for the Norway spruce stands; the parameters are significant at  $p < 0.05$  in ANOVA using the Satterthwaite's method; 'n.s.' no significant effect; 'NA' not applicable.

| Depth | C <sub>tot</sub> | N <sub>tot</sub> | S <sub>tot</sub> | C:N  | pH     | Sand   | Silt  | Clay | Al <sub>o</sub> | Fe <sub>o</sub> |
|-------|------------------|------------------|------------------|------|--------|--------|-------|------|-----------------|-----------------|
| F+H   | 0.524            | 0.601            | 0.581            | n.s. | -0.602 | NA     | NA    | NA   | NA              | NA              |
| 0–2   | 0.725            | 0.616            | 0.781            | n.s. | -0.415 | n.s.   | n.s.  | n.s. | n.s.            | n.s.            |
| 2–10  | 0.800            | 0.824            | 0.756            | n.s. | n.s.   | -0.545 | 0.555 | n.s. | 0.740           | 0.647           |
| 10–20 | 0.821 a          | 0.729            | 0.753            | n.s. | n.s.   | n.s.   | n.s.  | n.s. | 0.848           | 0.797 a         |
| 20–30 | 0.847 a          | 0.691            | 0.731            | n.s. | n.s.   | n.s.   | n.s.  | n.s. | 0.818           | 0.675           |

<sup>a</sup> Random effects failed to fit (singular model)

**Table S2.** Coefficients of the fixed effects in mixed effects models of Hg contents in different soil depths, separately for European beech stands; the parameters are significant at  $p < 0.05$  in ANOVA using the Satterthwaite's method; 'n.s.' no significant effect; 'NA' not applicable.

| Depth | C <sub>tot</sub> | N <sub>tot</sub> | S <sub>tot</sub> | C:N  | pH     | Sand   | Silt    | Clay   | Al <sub>o</sub> | Fe <sub>o</sub> |
|-------|------------------|------------------|------------------|------|--------|--------|---------|--------|-----------------|-----------------|
| FH    | n.s.             | n.s.             | n.s.             | n.s. | -0.447 | NA     | NA      | NA     | NA              | NA              |
| 0–2   | 0.474            | 0.641            | 0.568            | n.s. | -0.487 | n.s.   | n.s.    | n.s.   | n.s.            | n.s.            |
| 2–10  | 0.613            | 0.853            | 0.661 a          | n.s. | -0.438 | -0.512 | 0.532   | n.s.   | n.s.            | 0.462 a         |
| 10–20 | 0.835            | 0.821            | 0.605            | n.s. | -0.318 | -0.537 | 0.641   | -0.372 | n.s.            | 0.748 a         |
| 20–30 | 0.977            | 0.981            | 0.917            | n.s. | -0.452 | -0.584 | 0.643 a | -0.399 | n.s.            | 0.585 a         |

<sup>a</sup> Random effects failed to fit (singular model)
